# Supplementary material for: Are pvcrt-o and pvmdr1 Gene Mutations Associated with Plasmodium vivax Chloroquine-Resistant Parasites?
Source: MDPI journal article supplement (doi:10.3390/biomedicines12010141), 2024-01-09
Supplement: s1 [file s1]

## Supplementary Material

**Table S1.** Patients followed- up at CPD-Mal and SIVEP-Malaria database Platform, carrying *P. vivax* parasites containing the insertion of K10 in *pvcrt-o*, according to the state of infection.

|                                       | Patients | State of infection | Date of diagnosis                       | Days until cure <sup>1</sup>              |
|---------------------------------------|----------|--------------------|-----------------------------------------|-------------------------------------------|
| CPD-Mal<br>follow-up                  | A        | Acre               | 02/26/2018                              | 14                                        |
|                                       | B        | Pará               | 09/01/2018                              | 19                                        |
|                                       | C        | Roraima            | 02/17/2020                              | 3                                         |
|                                       | D        | Roraima            | 08/29/2020                              | 3                                         |
|                                       | E        | Amazonas           | 09/12/2020                              | 7                                         |
|                                       | F        | Amazonas           | 11/17/2020                              | 6                                         |
|                                       | G        | Amazonas           | 01/05/2021                              | 8                                         |
|                                       | Patients | State of infection | Date of first diagnosis<br>notification | Days until last diagnosis<br>notification |
| SIVEP-Malaria<br>database<br>Platform | H        | Acre               | 07/12/2016                              | -                                         |
|                                       | I        | Acre               | 01/20/2018                              | 178                                       |
|                                       | J        | Acre               | 07/18/2018                              | 121                                       |
|                                       | K        | Acre               | 07/21/2018                              | -                                         |
|                                       | L        | Acre               | 02/15/2018                              | 159                                       |
|                                       | M        | Acre               | 07/26/2018                              | -                                         |

<sup>1</sup> cure: parasitological and molecular negative assays
